# Supplementary material for: Synthesis of dithioglycol-functionalized periodic mesoporous organosilicas for the simultaneous removal of mercury ions and organic dyes from water
Source: Royal Society of Chemistry journal article supplement (doi:10.1039/d3nj04896a), 2024-01-01
Supplement: d3nj04896a1.pdf [file d3nj04896a1.pdf]

## Supporting Information

### **Synthesis of dithioglycol-functionalized periodic mesoporous organosilicas for the simultaneous removal of mercury ions and organic dyes from water**

Yuanjiang Zhao, Yuhang Liu and Liming Jiang\*

MOE Key Laboratory of Macromolecular Synthesis and Functionalization,  
Department of Polymer Science and Engineering, Zhejiang University, Hangzhou  
310027, China

#### **Index:**

1. Synthesis of materials
2. Figure S1. <sup>1</sup>H NMR spectra of 2-acetylthioethanethiol (**1**)
3. Figure S2. NMR spectra of 1,2-bis(triethoxysilyl)ethene (BTEE)
4. Figure S3. NMR spectra of 1-(2-thioacetylethylthio)-1,2-bis(triethoxysilyl)ethane (**2**)
5. Figure S4. NMR for S-(2-Mercaptoethyl)-1-thio-1,2-bis(triethoxysilyl)ethane (DTG-BTEE)
6. Figure S5. SEM images of DT-PMO and OMS particles
7. Figure S6. TGA and DTG curves of PMO-100T
8. Figure S7. The adsorption selectivity of PMO-100T
9. Figure S8. XPS spectra of PMO-100T and Hg@PMO-100T
10. Figure 9. The % RhB removal from water by PMO-100T
11. Figure S10. XRD patterns of PMO-100T before and after Hg(II) adsorption
12. Table S1. Fitting parameters for isotherm adsorption models
13. Table S2. Fitting parameters for kinetic models

## 1. Synthesis of materials

**2-acetylthioethanethiol (ref. 1):** To a solution of 1,2-ethanedithiol (4.71 g, 50 mmol) in pyridine (13 mL) and dichloromethane (13 mL) was added acetic anhydride (5.105 g, 50 mmol). The resulting mixture was stirred at room temperature for 18 h. the solvent was removed under reduced pressure and the product (**1**) was purified by chromatography on silica gel using dichloromethane/hexanes (1:1, v/v) to give a light yellow liquid.

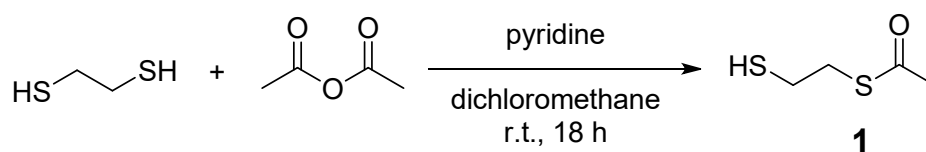

## 2. Characterization data

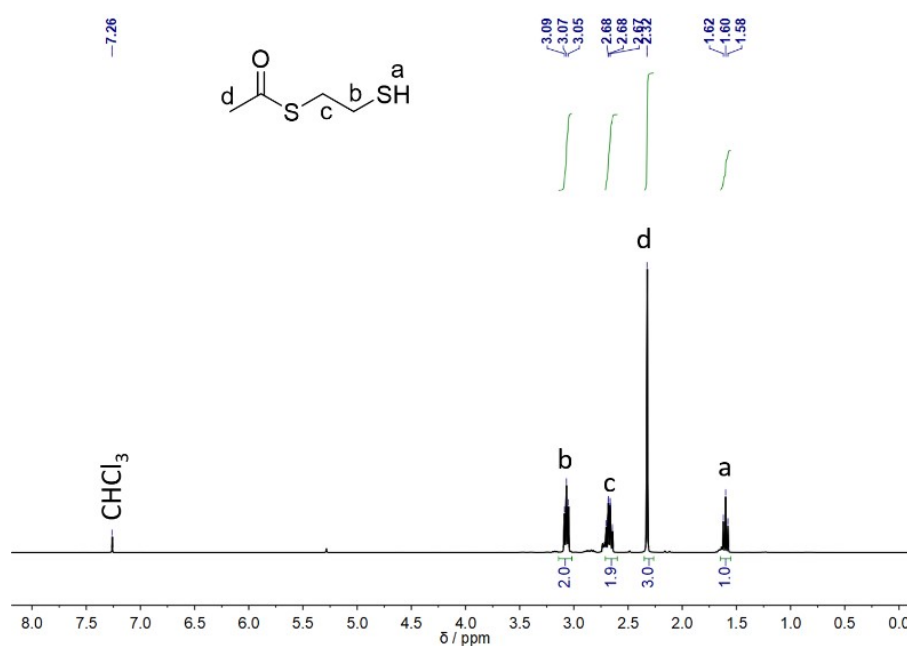

**Figure S1.** <sup>1</sup>H NMR (400 MHz, CDCl<sub>3</sub>) of 2-acetylthioethanethiol (**1**). <sup>1</sup>H NMR (400 MHz, CDCl<sub>3</sub>) δ 3.09 (t, *J* = 7.4 Hz, 2H), 2.70 (dt, *J* = 8.6, 7.5 Hz, 2H), 2.35 (s, 3H), 1.62 (t, *J* = 8.4 Hz, 1H).

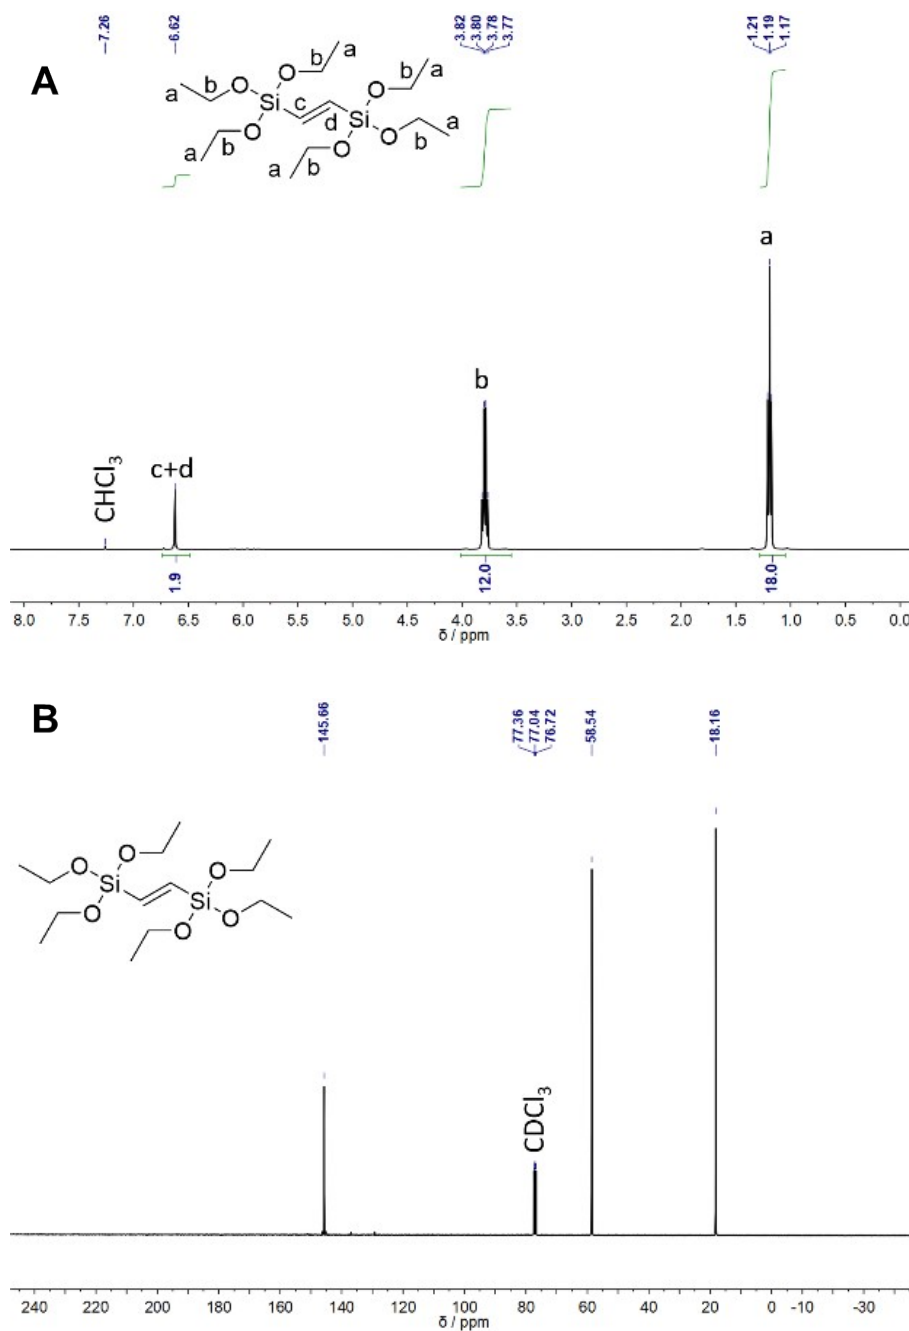

**Figure S2.** (A)  $^1\text{H}$  NMR (400 MHz,  $\text{CDCl}_3$ ) and (B)  $^{13}\text{C}$  NMR (101 MHz,  $\text{CDCl}_3$ ) spectra of 1,2-(*E*)-bis(triethoxysilyl)ethene (BTEE).  $^1\text{H}$  NMR:  $\delta$  6.62 (s, 2H), 3.79 (q,  $J = 7.0$  Hz, 12H), 1.19 (t,  $J = 7.0$  Hz, 18H);  $^{13}\text{C}$  NMR:  $\delta$  145.66 (s), 58.54 (s), 18.16 (s).

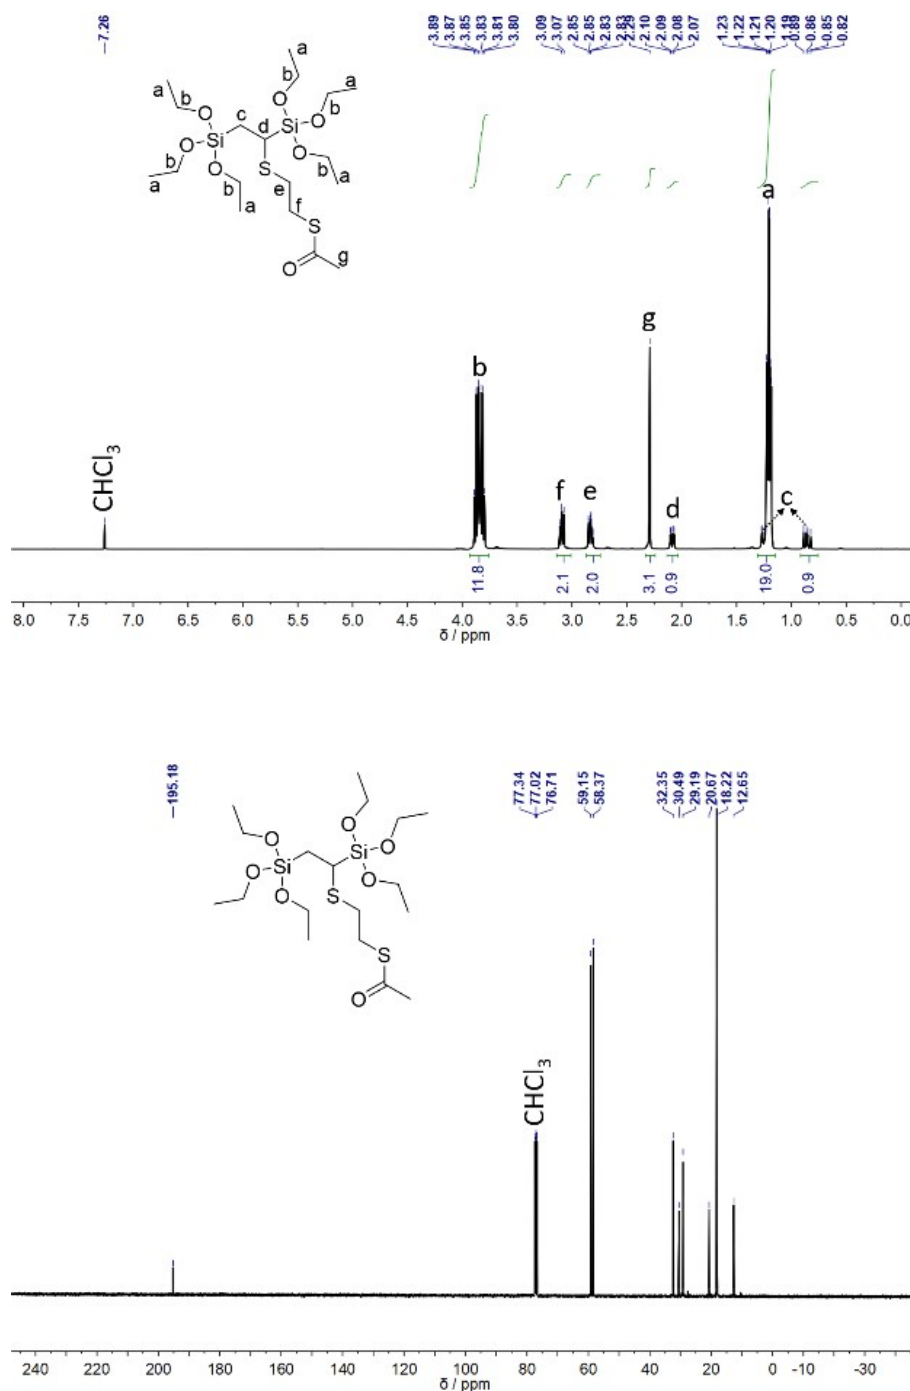

**Figure S3.** (A)  $^1\text{H}$  NMR (400 MHz,  $\text{CDCl}_3$ ) and (B)  $^{13}\text{C}$  NMR (101 MHz,  $\text{CDCl}_3$ ) spectra of 1-(2-thioacetyethylthio)-1,2-bis(triethoxysilyl)ethane (**2**).  $^1\text{H}$  NMR  $\delta$  3.96–3.75 (m, 12H), 3.17–3.02 (m, 2H), 2.91–2.76 (m, 2H), 2.31 (s, 3H), 2.11 (dd,  $J = 10.7$ , 3.8 Hz, 1H), 1.37–1.11 (m, 19H), 0.96–0.80 (m, 1H).  $^{13}\text{C}$  NMR  $\delta$  195.18 (s), 59.15 (s), 58.37 (s), 32.35 (s), 30.49 (s), 29.19 (s), 20.67 (s), 18.22 (s), 12.65 (s).

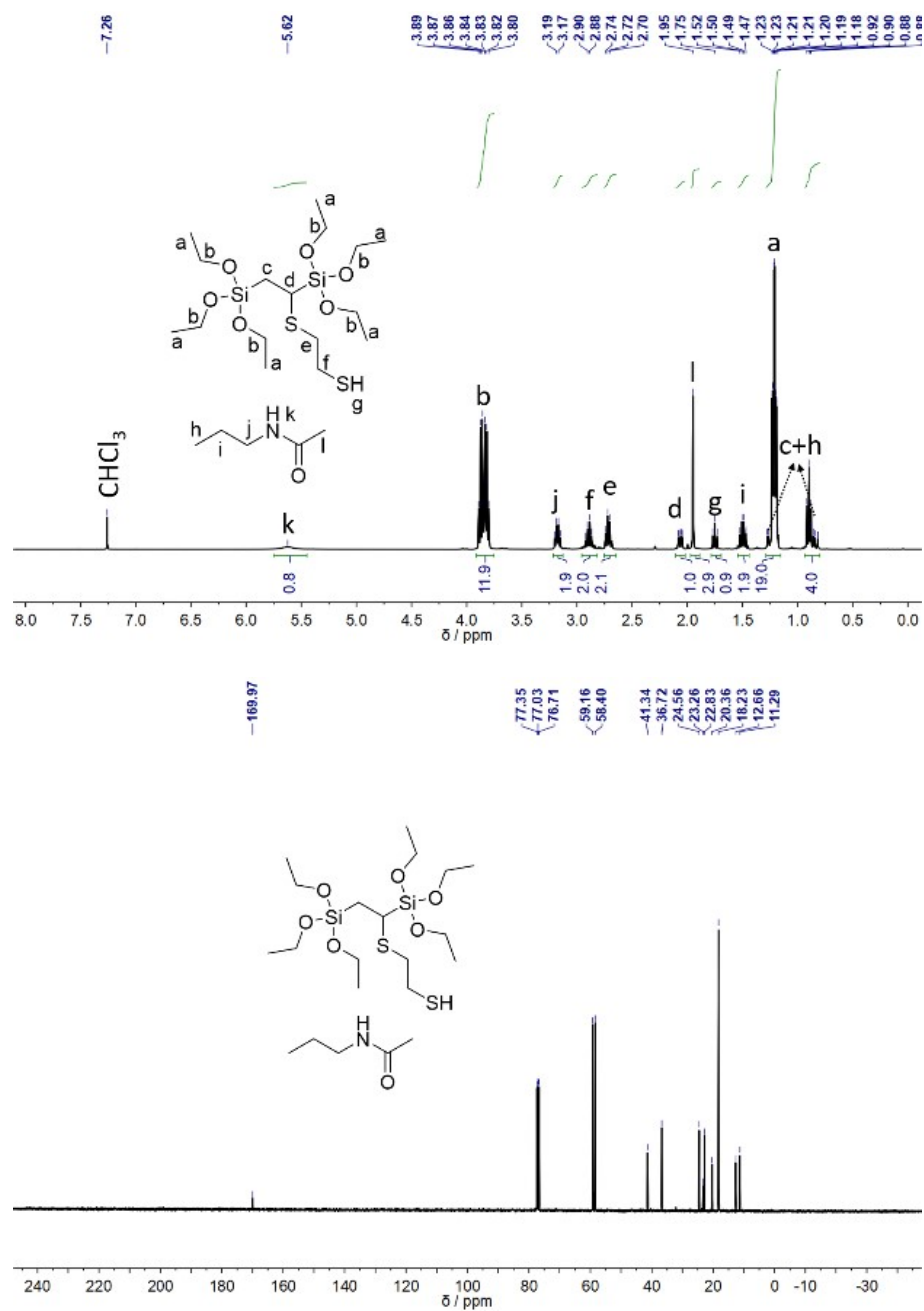

**Figure S4.** <sup>1</sup>H NMR and <sup>13</sup>C NMR of a mixture containing 1-(2-mercaptoethylthio)-1,2-bis(triethoxysilyl)ethane (DT-BTEE) and propylacetamide. <sup>1</sup>H NMR (400 MHz, CDCl<sub>3</sub>) δ 5.62 (s, 1H), 3.84 (dq, *J* = 10.5, 7.0 Hz, 12H), 3.18 (dd, *J* = 13.6, 6.6 Hz, 2H), 2.93–2.85 (m, 2H), 2.75–2.69 (m, 2H), 2.06 (dd, *J* = 10.7, 3.7 Hz, 1H), 1.95 (s, 3H), 1.75 (t, *J* = 8.1 Hz, 1H), 1.49 (dt, *J* = 14.6, 7.3 Hz, 2H), 1.28–1.18 (m, 19H), 0.94–0.77 (m, 4H). <sup>13</sup>C NMR (101 MHz, CDCl<sub>3</sub>) δ 169.97 (s), 59.16 (s), 58.40 (s), 41.34 (s), 36.72 (s), 24.56 (s), 23.26 (s), 22.83 (s), 20.36 (s), 18.23 (s), 12.66 (s), 11.29 (s).

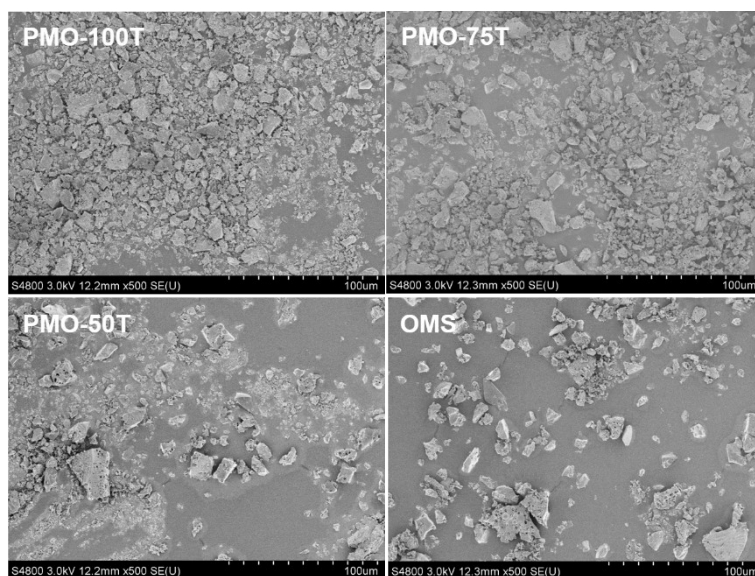

**Figure S5.** SEM images of DT-PMO and OMS particles.

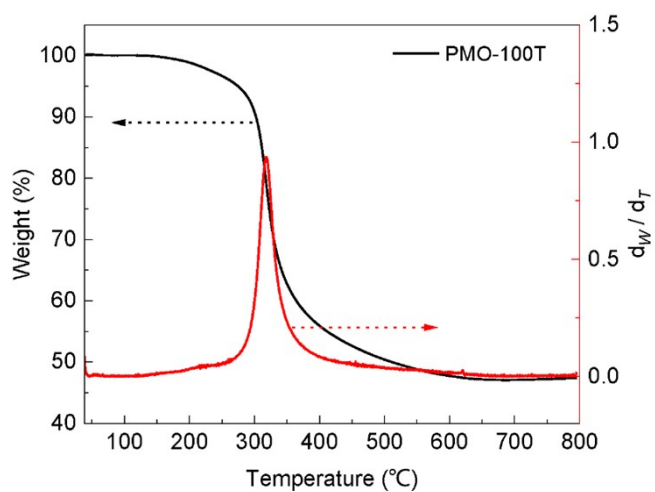

**Figure S6.** TGA and DTG curves of PMO-100T.

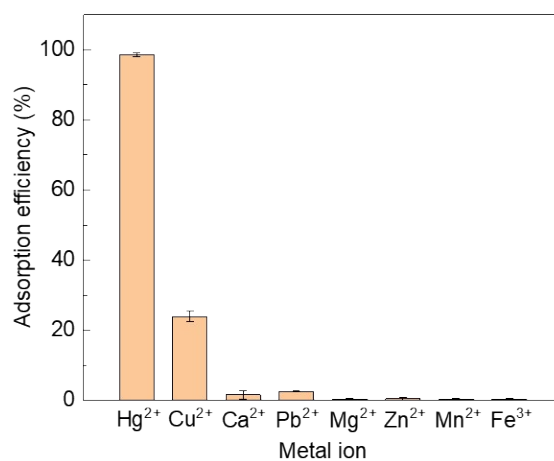

**Figure S7.** The adsorption selectivity of PMO-100T (the initial concentration of each coexisting ion was 10 ppm).

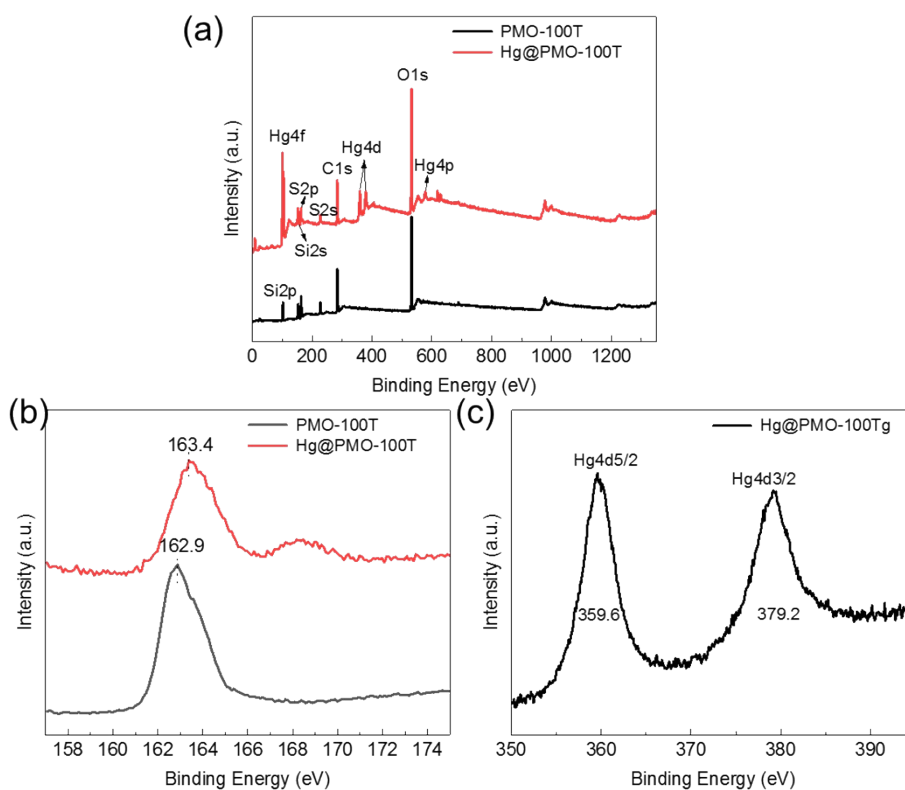

**Figure S8.** (a) Full survey XPS spectra of PMO-100T and Hg@PMO-100T samples. High resolution spectra of (b) S2p and (c) Hg4d.

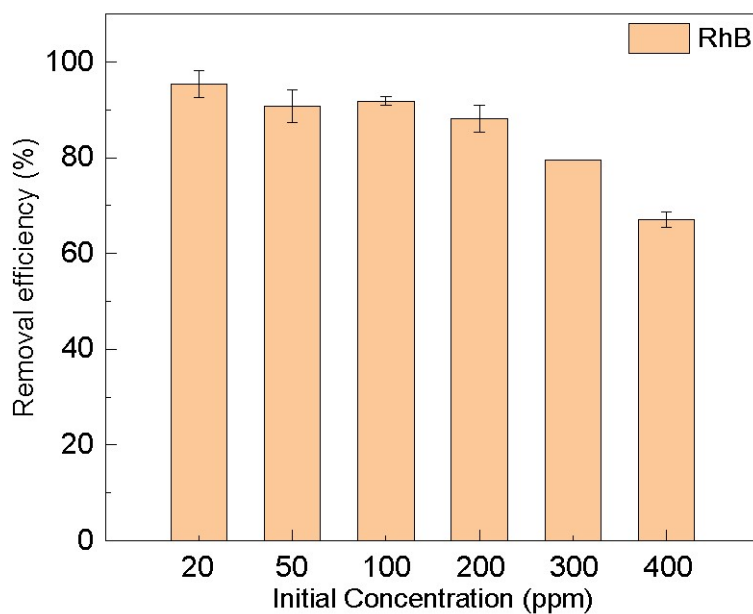

**Figure S9.** Histogram showing the % RhB removal from water by PMO-100T at the initial concentration of 20–400 ppm (adsorbent conc.= 1.5 mg/mL, pH = 5).

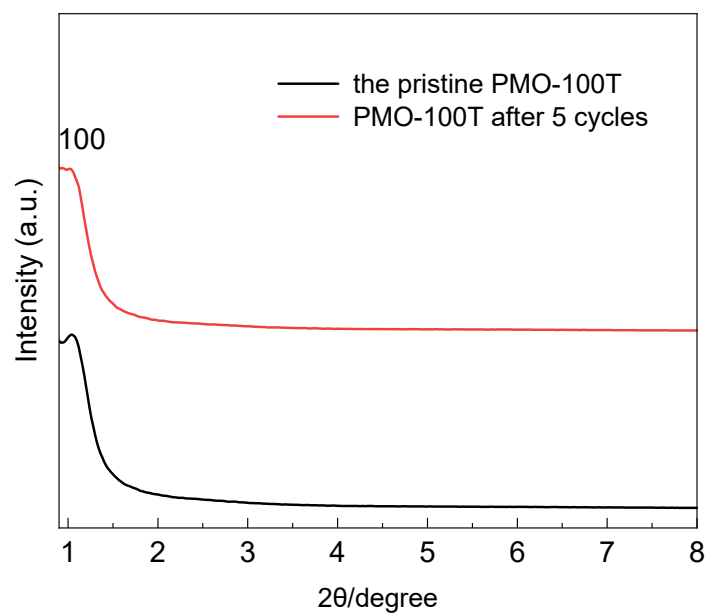

**Figure S10.** XRD patterns of PMO-100T before Hg(II) adsorption and after it uses for 5th cycle.



Table S1. The parameters of the Langmuir and Freundlich models

| Pollutants       | Langmuir model              |                           |        | Freundlich model            |        |        |
|------------------|-----------------------------|---------------------------|--------|-----------------------------|--------|--------|
|                  | $q_m$ (mg g <sup>-1</sup> ) | $K$ (L mg <sup>-1</sup> ) | $R^2$  | $K_f$ (mg g <sup>-1</sup> ) | $n$    | $R^2$  |
| Hg <sup>2+</sup> | 1253.0                      | 0.04042                   | 0.9861 | 49.7172                     | 1.5650 | 0.9097 |
| RhB              | 317.9                       | 0.0491                    | 0.9989 | 27.5328                     | 1.9062 | 0.9982 |

Table S2. The parameters of pseudo-first-order and pseudo-second-order kinetics models

| Pollutants       | $q_{e, \text{exp.}}$<br>(mg/g) | pseudo-first    |                               |        | pseudo-second   |                                                  |        |
|------------------|--------------------------------|-----------------|-------------------------------|--------|-----------------|--------------------------------------------------|--------|
|                  |                                | $q_e$<br>(mg/g) | $k_1$<br>(min <sup>-1</sup> ) | $R^2$  | $q_e$<br>(mg/g) | $k_2$<br>(g mg <sup>-1</sup> min <sup>-1</sup> ) | $R^2$  |
| Hg <sup>2+</sup> | 898.8                          | 176.5           | 0.02657                       | 0.8709 | 900.9           | $6.55 \times 10^{-4}$                            | 0.9999 |
| RhB              | 268.6                          | 17.9            | 0.00541                       | 0.5206 | 262.5           | $3.0 \times 10^{-3}$                             | 0.9999 |

### References:

- [1] J. Xun, H. D. Huang, K. W. Vogel, D. G. Drueckhammer, The importance of the amide bond nearest the thiol group in enzymatic reactions of coenzyme A. *Bioorg. Chem.*, 2005, 33, 90–107.
